# Supplementary material
Source: Springer Nature journal article supplement (https://www.springermedizin.de/resource/supplementary/13223_2013_513_MOESM1_ESM.pdf/9596690)

MW

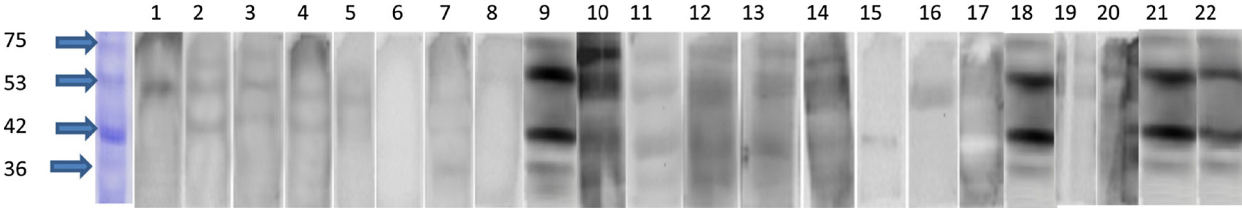

Supplement: MOESM1 [file 9596690]
